# Supplementary material
Source: PubMed Central journal article supplement (PMC7061841)
Supplement: ajtr0012-0697-f5.pdf [file ajtr0012-0697-f5.pdf]

## A novel therapeutic target of renal carcinoma

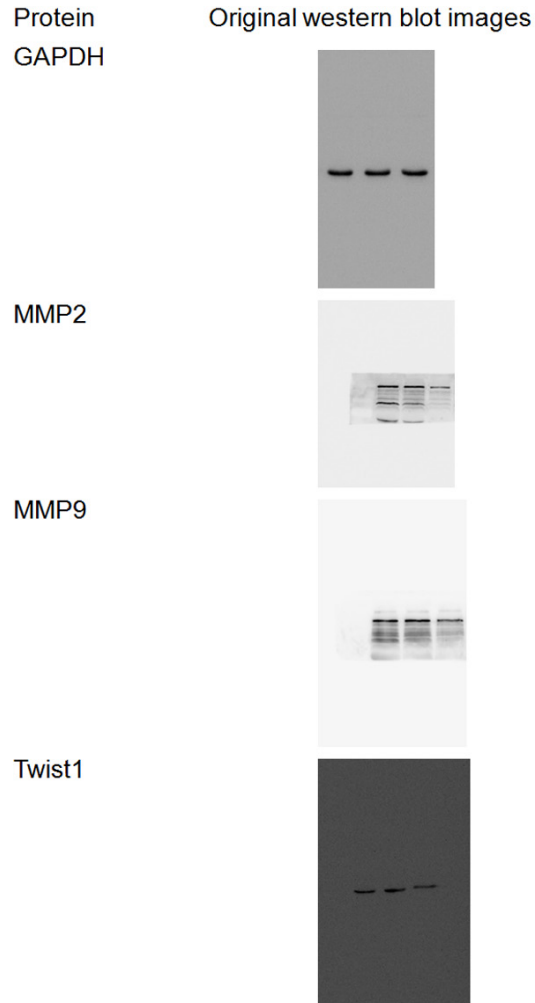

**Supplementary Figure 1.** The original western bolt images for **Figure 4E**. The expression of MMP2 and MMP9 protein were measured and quantitated (right panel) following control shRNA treatment of shRNA downregulation of miR-363-3p in 786-O cells.

### Non-metastatic RCC tissues    Metastatic RCC tissues

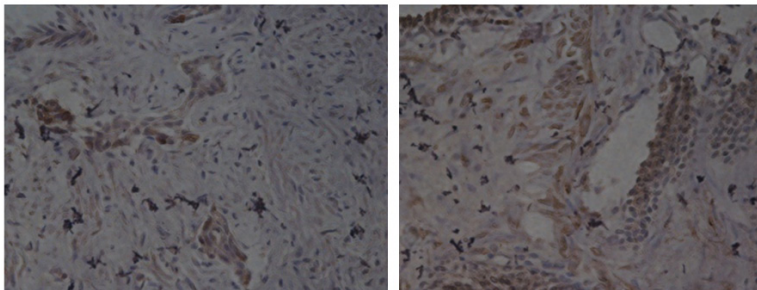

**Supplementary Figure 2.** Immunohistochemistry analysis was performed to analyze the Twist1 expression status. The Twist1 expression ratio (60%, n=29) in metastatic RCC specimens was significantly higher than that (30%, n=36) in non-metastatic RCC specimens ( $\chi^2=15$ ,  $P=0.01$ ).
